# Supplementary material for: High Multi-Environmental Mechanical Stability and Adhesive Transparent Ionic Conductive Hydrogels Used as Smart Wearable Devices
Source: MDPI journal article supplement (doi:10.3390/polym14235316), 2022-12-05
Supplement: s1 [file s1]

## **Supporting Information**

### **High Multi-Environmental Mechanical Stability and Adhesive Transparent Ionic Conductive Hydrogels Used as Smart Wearable Devices**

Yuxuan Wu, Jing Liu, Zhen Chen, Yujie Chen \*, Wenzheng Chen, Hua Li and Hezhou  
Liu \*

State Key Laboratory of Metal Matrix Composites, School of Materials Science and  
Engineering, Shanghai Jiao Tong University, Shanghai 200240, China

\* Correspondence: yujiechen@sjtu.edu.cn (Y.C.); hzliu@sjtu.edu.cn (H.L.); Tel.:  
+86-21-34202546 (H.L.)

**Table S1.** Composition of the hydrogels.

| Name                                                   | TA@BC<br>(wt %) | AA<br>(g) | AMPS<br>(g) | UV<br>initiator | H <sub>2</sub> O<br>(g) | CaCl <sub>2</sub><br>(g) |
|--------------------------------------------------------|-----------------|-----------|-------------|-----------------|-------------------------|--------------------------|
|                                                        |                 |           |             | ( $\mu$ l)      |                         |                          |
| P(AA-AMPS)                                             | 0               | 1.25      | 1.25        | 4               | 10                      | 0                        |
| P(AA-AMPS)-TA@BA <sub>0.25</sub> -<br>Ca <sup>2+</sup> | 0.25            | 1.25      | 1.25        | 4               | 10                      | 4.4                      |
| P(AA-AMPS)-TA@BA <sub>0.5</sub>                        | 0.5             | 1.25      | 1.25        | 4               | 10                      | 0                        |
| P(AA-AMPS)-TA@BA <sub>0.5</sub> -<br>Ca <sup>2+</sup>  | 0.5             | 1.25      | 1.25        | 4               | 10                      | 4.4                      |
| P(AA-AMPS)-TA@BA <sub>1</sub> -Ca <sup>2+</sup>        | 1.0             | 1.25      | 1.25        | 4               | 10                      | 4.4                      |

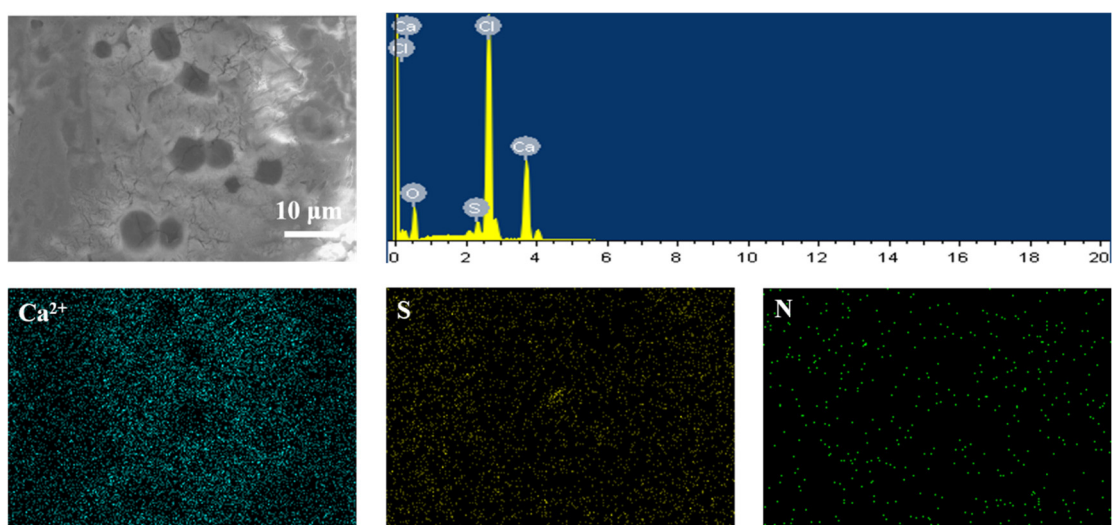

**Figure S1.** EDS images of the surface of the P(AA-AMPS)-TA@BC- $\text{Ca}^{2+}$  hydrogel.

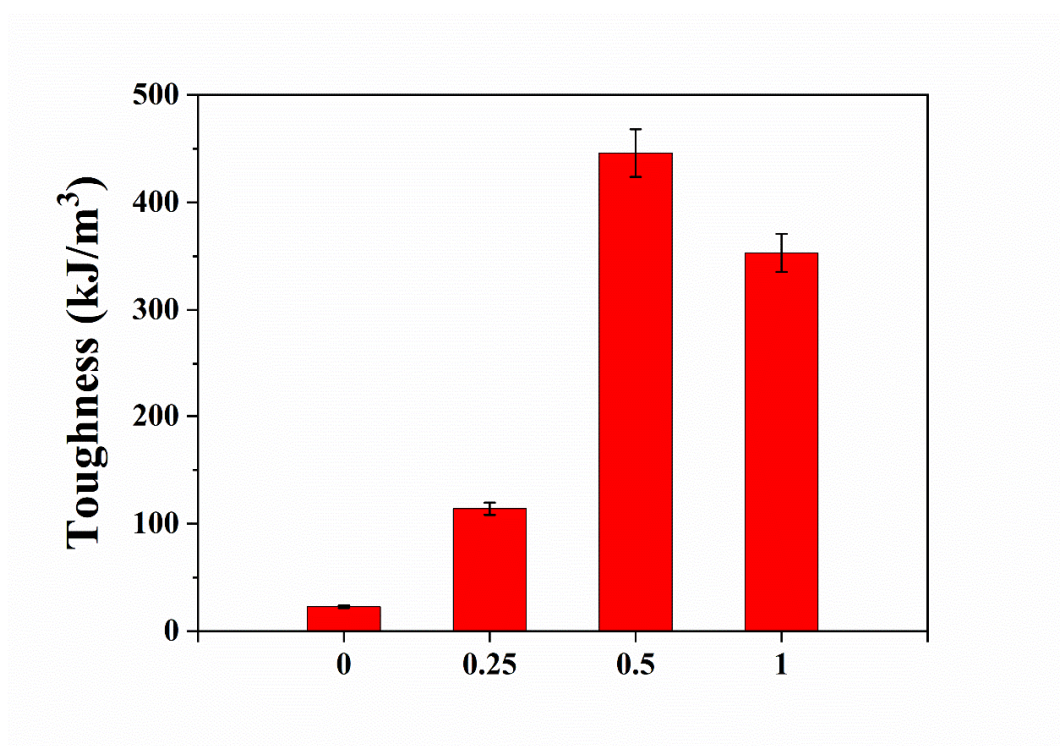

**Figure S2.** Toughness of P(AA-AMPS)-TA@BC- $\text{Ca}^{2+}$  hydrogels with different concentrations of TA@BC (0/0.25/0.5/1) (the error bars show the error range of the experiment).

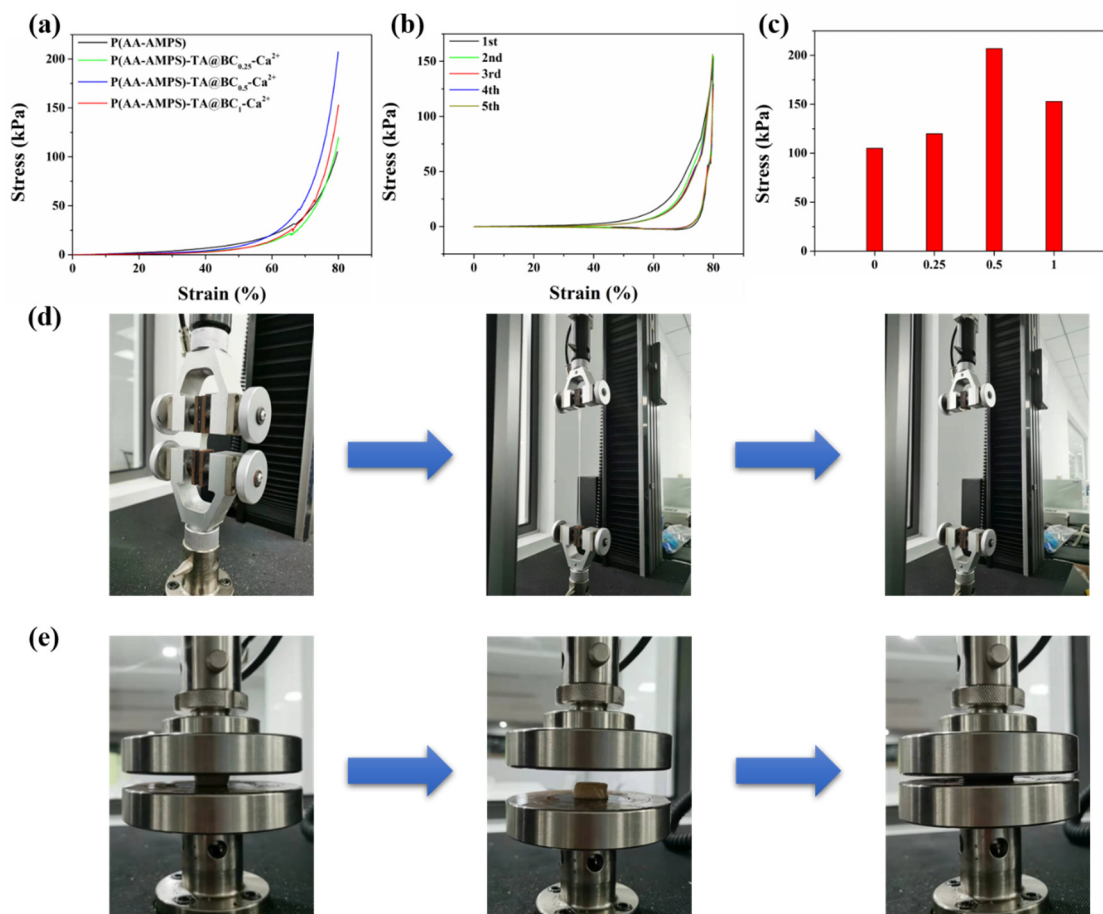

**Figure S3.** (a) Compressive stress-strain curves of P(AA-AMPS)-TA@BC-Ca<sup>2+</sup> hydrogels with different concentrations of TA@BC; (b) Curves of compression-release cycles (80%, 5 cycles) of P(AA-AMPS)-TA@BC<sub>0.5</sub>-Ca<sup>2+</sup> hydrogel; (c) Compression stress-strain histogram of P(AA-AMPS), P(AA-AMPS)-TA@BC<sub>0.5</sub>, P(AA-AMPS)-TA@BC<sub>0.5</sub>-Ca<sup>2+</sup> hydrogel; (d) Diagram of the stretching process; (e) Diagram of compression process.

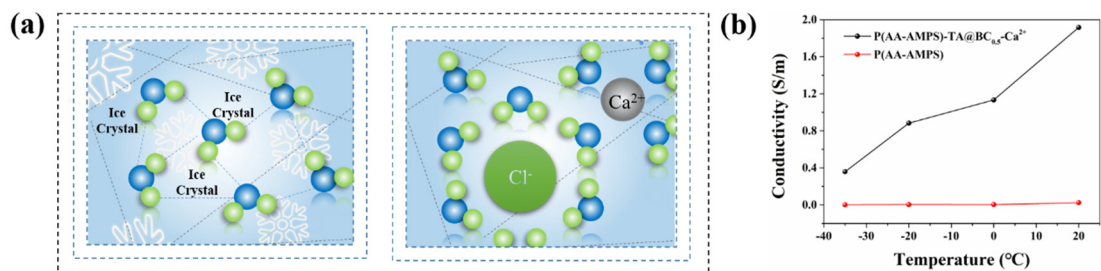

**Figure S4.** Mechanism of anti-freezing and moisturizing and electrical conductivity of hydrogel. (a) The interaction between  $\text{Ca}^{2+}/\text{Cl}^-$  ions and water molecules in  $\text{CaCl}_2$  solution and the principle diagram of antifreeze and moisture retention (the unlabeled blue spheres represent oxygen atoms and the green spheres represent hydrogen atoms); (b) Electrical conductivity of P(AA-AMPS) and P(AA-AMPS)-TA@BC<sub>0.5</sub>-Ca<sup>2+</sup> hydrogels at different temperatures.

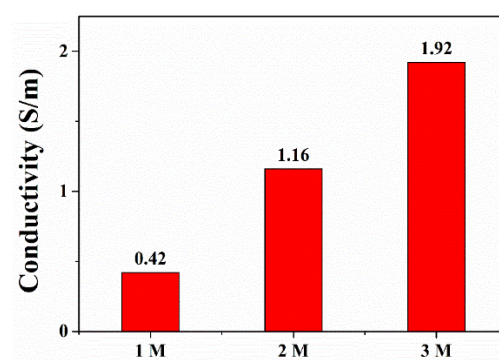

**Figure S5.** Hydrogel conductivity with diverse ion concentration

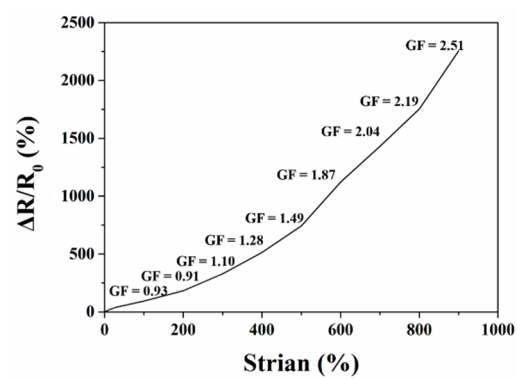

**Figure S6.** The RRC value and GF value of P(AA-AMPS)-TA@BC<sub>0.5</sub>-Ca<sup>2+</sup> hydrogel in strain from 2.5% to 900%.

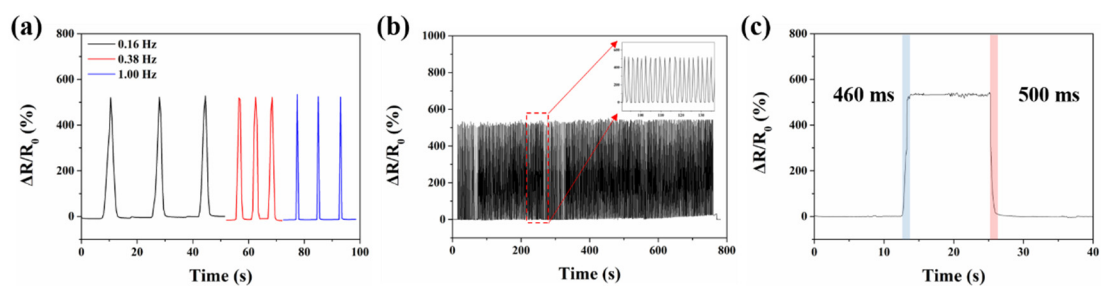

**Figure S7.** (a) Response frequency of P(AA-AMPS)-TA@BC<sub>0.5</sub>-Ca<sup>2+</sup> sensor. (b) RRC of P(AA-AMPS)-TA@BC<sub>0.5</sub>-Ca<sup>2+</sup> sensor elongated to a strain of 400% for 300 cycles under stretching mode. (c) Response and recovery time of P(AA-AMPS)-TA@BC<sub>0.5</sub>-Ca<sup>2+</sup> strip under the 400% strain.
